# Supplementary material for: Achieving ultrahigh energy storage density and efficiency in 0.90NaNbO3–0.10BaTiO3 ceramics via a composition modification strategy
Source: Royal Society of Chemistry journal article supplement (doi:10.1039/d2dt01265k), 2022-01-01
Supplement: d2dt01265k1.pdf [file d2dt01265k1.pdf]

## Support Information

**Achieving ultrahigh energy storage density and efficiency in 0.90NaNbO<sub>3</sub>-**

**0.10BaTiO<sub>3</sub> ceramic via a composition modification strategy**

Hua Wang<sup>1,2</sup>, Enzhu Li<sup>1,2\*</sup>, Mengjiang Xing<sup>3</sup>, Chaowei Zhong<sup>1,2</sup>

<sup>1</sup> National Engineering Research Center of Electromagnetic Radiation Control  
Materials, University of Electronic Science and Technology of China, Chengdu,

610054, China

<sup>2</sup> Key Laboratory of Multi-Spectral Absorbing Materials and Structures of Ministry of  
Education, University of Electronic Science and Technology of China, Chengdu,

610054, China

<sup>3</sup> Yangtze Delta Region Institute (Huzhou), University of Electronic Science and  
Technology of China, Huzhou, 313001, China

---

\* Corresponding authors: E-mail addresses: lienzhu@uestc.edu.cn

**Table S1** refinement parameters of NNBT-*x*BLMT ceramics

| <i>x</i> | lattice parameters/(Å)                                                                 | $R_p/\%$ | $R_{wp}/\%$ | $\chi^2$ |
|----------|----------------------------------------------------------------------------------------|----------|-------------|----------|
| 0        | $\alpha = \beta = \gamma = 90^\circ$<br>a = b = 3.931356<br>c = 3.932283<br>V = 60.778 | 3.05     | 3.89        | 2.029    |
| 0.05     | $\alpha = \beta = \gamma = 90^\circ$<br>a = b = 3.933834<br>c = 3.933572<br>V = 60.872 | 3.60     | 4.82        | 2.764    |
| 0.10     | $\alpha = \beta = \gamma = 90^\circ$<br>a = b = 3.938624<br>c = 3.937000<br>V = 61.074 | 3.91     | 5.48        | 3.202    |
| 0.15     | $\alpha = \beta = \gamma = 90^\circ$<br>a = b = 3.945789<br>c = 3.945971<br>V = 61.436 | 3.49     | 4.65        | 2.159    |
| 0.20     | $\alpha = \beta = \gamma = 90^\circ$<br>a = b = 3.951609<br>c = 3.952425<br>V = 61.718 | 3.55     | 4.95        | 2.330    |

**Table S2** Comparison of the energy storage properties of NNBT-0.10BLMT ceramics with other recently reported energy storage ceramics

| Materials                                                                                                                                                 | BDS(kV/cm) | $W_{\text{rec}}$ (J/cm <sup>3</sup> ) | $\eta$ (%) | Ref.      |
|-----------------------------------------------------------------------------------------------------------------------------------------------------------|------------|---------------------------------------|------------|-----------|
| 0.97K <sub>0.5</sub> Na <sub>0.5</sub> NbO <sub>3</sub> -0.03La(Mn <sub>0.5</sub> Ni <sub>0.5</sub> )O <sub>3</sub>                                       | 190        | 1.65                                  | 76         | 1         |
| 0.45Bi <sub>0.5</sub> Na <sub>0.5</sub> TiO <sub>3</sub> -0.55Sr <sub>0.7</sub> Bi <sub>0.2</sub> TiO <sub>3</sub>                                        | 100        | 1.34                                  | 96         | 2         |
| 0.90NaNbO <sub>3</sub> -0.10Bi(Zn <sub>0.5</sub> Sn <sub>0.5</sub> )O <sub>3</sub>                                                                        | 350        | 3.14                                  | 83         | 3         |
| 0.95[(Bi <sub>0.5</sub> Na <sub>0.5</sub> ) <sub>0.94</sub> Ba <sub>0.06</sub> TiO <sub>3</sub> ]-0.05AgNbO <sub>3</sub>                                  | 105        | 1.27                                  | 78         | 4         |
| 0.9(0.7BiFeO <sub>3</sub> -0.3BaTiO <sub>3</sub> )-0.1Nb                                                                                                  | 150        | 2.01                                  | 68         | 5         |
| 0.9(k <sub>0.5</sub> Na <sub>0.5</sub> )NbO <sub>3</sub> -0.1Bi(Zn <sub>2/3</sub> Nb <sub>1/3</sub> )O <sub>3</sub>                                       | 200        | 0.97                                  | -          | 6         |
| 0.50NaNbO <sub>3</sub> -0.50NaTaO <sub>3</sub>                                                                                                            | 300        | 2.2                                   | 80         | 7         |
| 0.80Bi <sub>0.5</sub> Na <sub>0.5</sub> TiO <sub>3</sub> -0.20SrTi <sub>0.5</sub> Zr <sub>0.5</sub> O <sub>3</sub>                                        | 150        | 1.85                                  | 66         | 8         |
| 0.85BaTiO <sub>3</sub> -0.15Bi(Ni <sub>1/2</sub> Ti <sub>1/2</sub> )O <sub>3</sub>                                                                        | 170        | 1.46                                  | 91         | 9         |
| 0.85K <sub>0.5</sub> Na <sub>0.5</sub> NbO <sub>3</sub> -0.15Bi(Ni <sub>0.5</sub> Ti <sub>0.5</sub> )O <sub>3</sub>                                       | 280        | 2.61                                  | 83         | 10        |
| 0.92Bi <sub>0.5</sub> (Na <sub>0.82</sub> K <sub>0.18</sub> ) <sub>0.5</sub> TiO <sub>3</sub> -0.08Bi(Mg <sub>2/3</sub> Nb <sub>1/3</sub> )O <sub>3</sub> | 110        | 2.20                                  | 55.7       | 11        |
| NNBT-0.10BLMT                                                                                                                                             | 400        | 2.68                                  | 90         | This work |

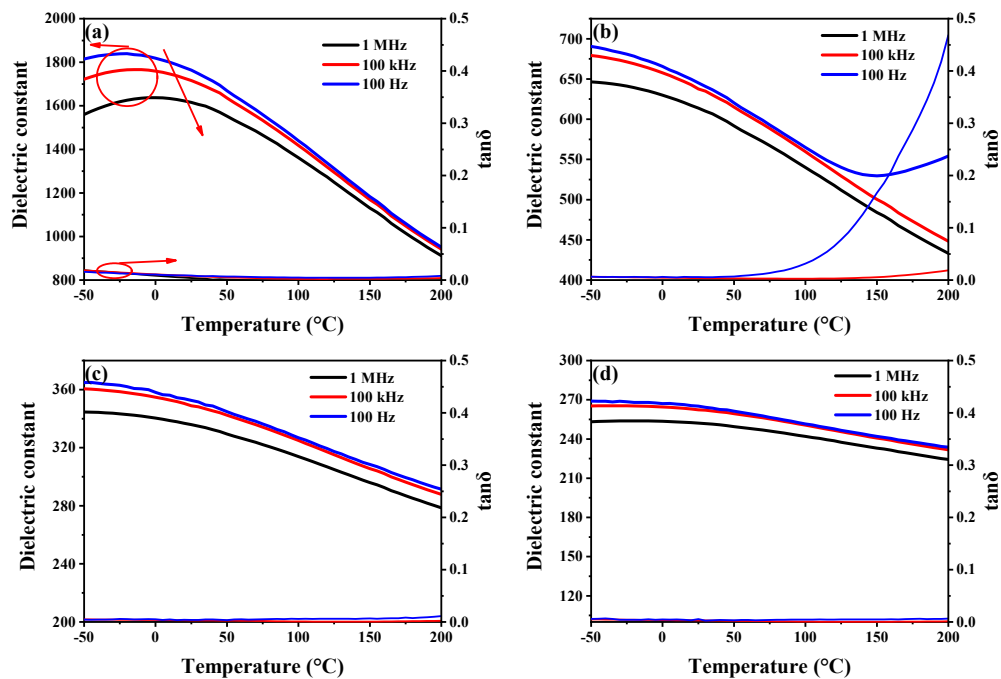

**Fig S1.** Temperature dependent the dielectric constant and dielectric loss of the materials: (a)

$x = 0.05$ , (b)  $x = 0.10$ , (c)  $x = 0.15$  and (d)  $x = 0.20$ .

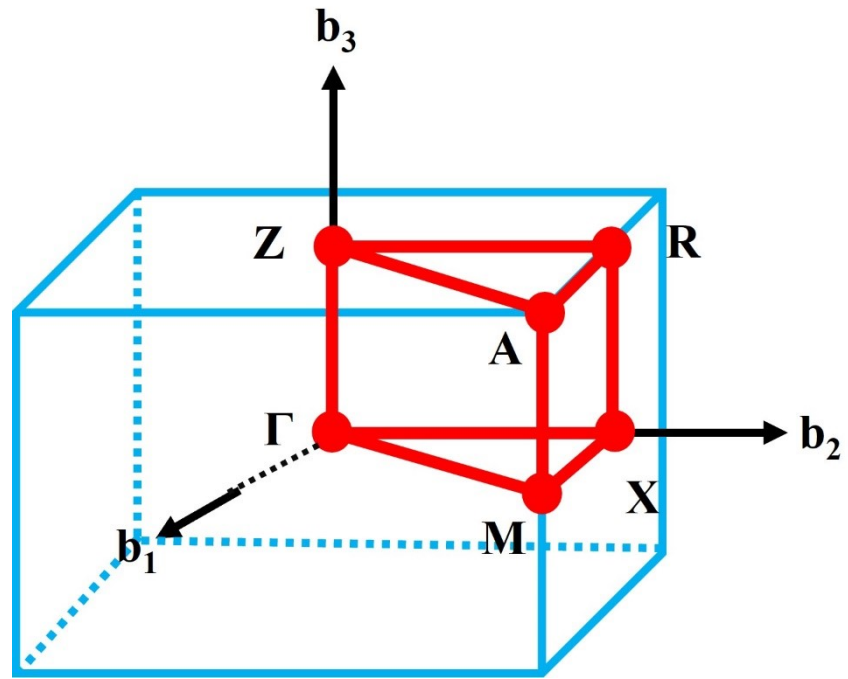

**Fig S2.** The energy band path of the tetragonal phase:  $\Gamma$ -X-M- $\Gamma$ -Z-R-A-Z|X-R|M-A.

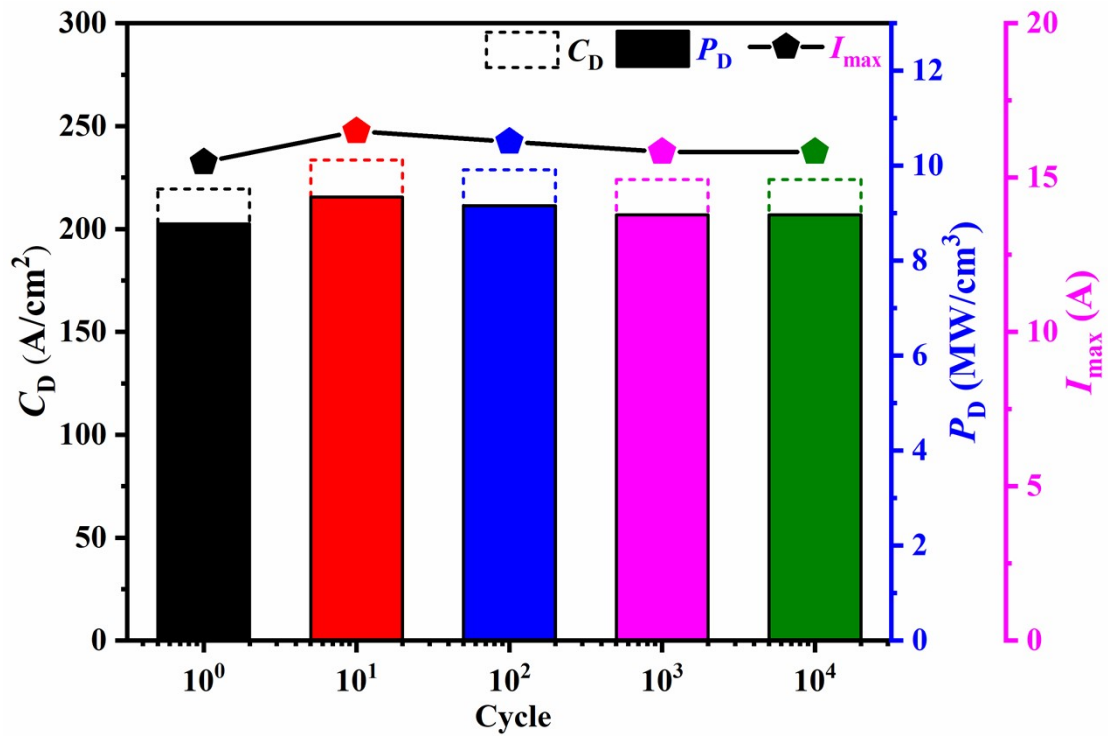

Fig S3. The cycle stability  $C_D$ ,  $P_D$ , and  $I_{max}$  for NNBT-0.10BLMT ceramic at 80 kV/cm.

## References

- 1 Z. Peng, Q. Shi, F. Zhang, J. Liu, X. Nie, J. Wang, S. Xu, D. Wu, Z. Yang and X. Chao, *J. Mater. Sci.*, 2022.
- 2 X. Zhou, K. Liu, Z. Yan, B. Xie, P. Fan, S. Chen, C. Samart, D. Salamon, H. Tan, Z. Fan and H. Zhang, *Ceram. Int.*, 2022.
- 3 D. Xiaoyan, L. Xu, H. Chen, D. Qinpeng, J. Wang, X. Wang, Y. Pan, X. Chen and Z. Huanfu, *Journal of Advanced Ceramics*, 2022, **11**, 729-741.
- 4 S. Zheng, Q. Li, Y. Chen, A. K. Yadav, W. Wang and H. Fan, *J. Alloy. Compd.*, 2022, **911**, 165019.
- 5 Z. Yang, B. Wang, Y. Li and D. A. Hall, *Materials*, 2022, **15**.
- 6 W. Chen, M. Cao, H. Wang, H. Hao, Z. Yao and H. Liu, *Journal of Materials Science: Materials in Electronics*, 2022, **33**, 10121-10130.
- 7 Z. Chen, S. Mao, L. Ma, G. Luo, Q. Feng, Z. Cen, F. Toyohisa, X. Peng, L. Liu, H. Zhou, C. Hu and N. Luo, *Journal of Materiomics*, 2022.
- 8 F. Zhang, Z. Dai, Y. Pan, G. Chen, J. Liu, W. Liu and T. Karaki, *Int. J. Energ. Res.*, 2022, **n/a**.
- 9 X. Huang, S. Li, C. Wang, H. Long, P. Chen, F. Xiao and Y. Chen, *Journal of Materials Science: Materials in Electronics*, 2022, **33**, 10042-10056.
- 10 X. Gan, H. Yang, Y. Lin and J. Li, *Ceram. Int.*, 2022, **48**, 14920-14927.
- 11 Z. Peng, J. Wang, M. Niu, X. Nie, S. Xu, F. Zhang, J. Wang, D. Wu, Z. Yang and X. Chao, *Journal of Materials Science: Materials in Electronics*, 2022, **33**, 3053-3064.
